# Supplementary figures and images for: Inhibition of p85, the non-catalytic subunit of phosphatidylinositol 3-kinase, exerts potent antitumor activity in human breast cancer cells
Source: PubMed Central journal article supplement — Cell Death Dis. 2012 Dec 6;3(12):e440–. doi: 10.1038/cddis.2012.179 (PMC3542615; doi:10.1038/cddis.2012.179), 2012-12-06

Figure S1

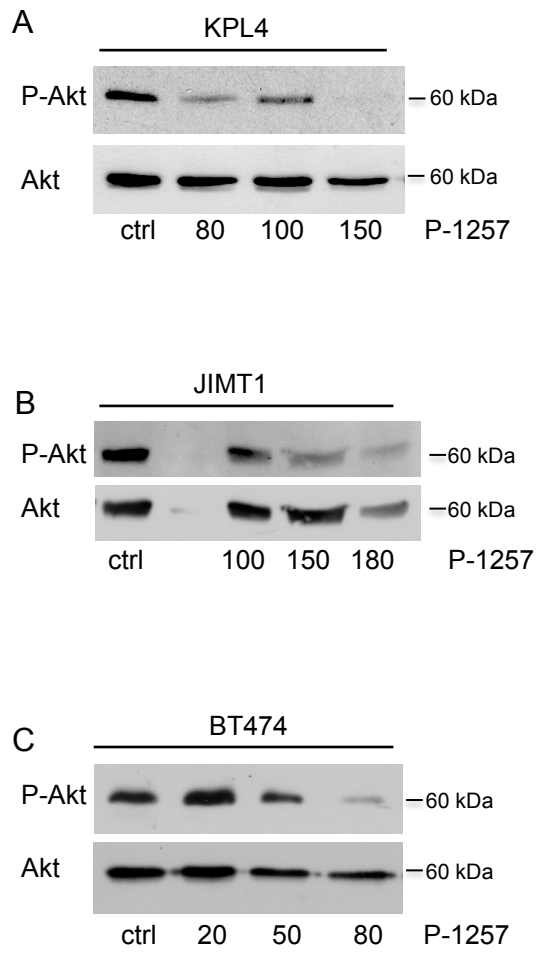

Supplement: cddis2012179x1.pdf [file cddis2012179x1.pdf]
